# Supplementary material for: American Exceptionalism: Population Trends and Flight Initiation Distances in Birds from Three Continents
Source: PLoS One. 2014 Sep 16;9(9):e107883. doi: 10.1371/journal.pone.0107883 (PMC4166455; doi:10.1371/journal.pone.0107883)
Supplement: File S10 — Lambda models based on Ericson [32] . (XLSX) [file pone.0107883.s010.xlsx]

## Sheet: Lambda_models
Electronic Supplementary Material S10: Candidates PGLS models based on Ericson phylogeny optimizing the Pagel’s lambda by maximum likelihood. The models describe the relationship between population trends of birds and continent (cont), farmland (farm), latitude (lat), flight initiation distance (FID), body mass (body), migration (migrat), and including continent by each factor and FID by body mas…
Intercept	Cont	Farm	Lat	FID	Body	Migrat	Cont: Farm	Cont: Lat	Cont: FID	Cont: Body	Cont: Migrat	FID: Body	logLik	AICc	delta AICc	Akaike weight
-1.02865	+	-0.919212		2.33067	-1.95008		+		+	+		0.88501	-289.847	610.054	0	0.308025
-0.984952	+	-0.574293		2.26648	-1.95015				+	+		0.895103	-292.199	610.13	0.0763556	0.296487
-2.18455	+	-0.787265		1.89488			+		+				-296.174	613.557	3.50313	0.053443
-2.18166	+	-0.718969		1.89127					+				-298.574	613.931	3.87694	0.0443323
-0.839425	+	-0.981025		2.17248	-2.13514	0.110183	+		+	+		1.01466	-290.634	613.98	3.92557	0.0432673
-0.797528	+	-0.562291		2.10406	-2.12541	0.105246			+	+		1.01985	-293.03	614.094	4.03964	0.0408685
-2.77562	+	-1.01096		3.77299	-0.813808		+		+	+			-293.168	614.369	4.31507	0.0356107
-2.74953	+	-0.633567		3.7206	-0.799666				+	+			-295.639	614.737	4.6831	0.0296253
-0.63233	+	-0.6449		0.174319	-0.631162		+		+			0.691779	-294.781	615.296	5.24206	0.022402
-0.61956	+	-0.64825		0.161244	-0.63734				+			0.697781	-297.119	615.447	5.39275	0.0207761
-0.748775	+	-0.558883		2.09173	-1.95747	-0.287123			+	+	+	0.933152	-291.561	615.835	5.78079	0.0171121
-0.768165	+	-0.722407		2.12065	-1.96131	-0.281217	+		+	+	+	0.930717	-289.263	616.023	5.96904	0.0155749
-2.09438	+	-0.753139		1.60836	0.124151		+		+				-296.821	617.101	7.04655	0.00908756
-2.09074	+	-0.671802		1.60345	0.124416				+				-299.221	617.425	7.37081	0.00772742
-1.94826	+	-0.475742		1.84961		-0.489356	+		+		+		-295.137	618.307	8.25337	0.00497038
-2.16265	+	-0.758399		1.89068		-0.0453444	+		+				-297.427	618.312	8.2583	0.00495815
-1.9627	+	-0.721433		1.86313		-0.480501			+		+		-297.497	618.454	8.3995	0.00462016
-2.15946	+	-0.71576		1.88825		-0.0483759			+				-299.82	618.623	8.56887	0.00424501
-2.774	+	-1.00913		3.7717	-0.813356	-0.00267539	+		+	+			-294.513	619.385	9.33128	0.00289951
-0.597242	+			1.90094	-2.1565				+	+		1.07205	-298.074	619.606	9.5521	0.00259641
-2.74478	+	-0.633871		3.71733	-0.798454	-0.00855073			+	+			-296.99	619.712	9.65834	0.00246209
-0.556229	+	-0.662764		0.0697659	-0.669138	0.0422902	+		+			0.734479	-295.999	620.031	9.97699	0.00209947
-2.50306	+	-0.623342		3.54874	-0.736255	-0.440258			+	+	+		-294.848	620.056	10.0024	0.00207299
-2.51116	+	-0.712625		3.56247	-0.740094	-0.436812	+		+	+	+		-292.498	620.086	10.0323	0.00204221
-0.545656	+	-0.646433		0.0602127	-0.673878	0.0401209			+			0.738732	-298.35	620.158	10.1043	0.00196999
-0.969498	+	-0.912939	-0.00106073	2.31578	-1.93268		+		+	+		0.879302	-294.043	620.797	10.7432	0.00143126
-0.907681	+	-0.57543	-0.0014202	2.2489	-1.92639				+	+		0.886819	-296.393	620.82	10.7662	0.00141495
-0.523438	+	-0.387741		0.172211	-0.544588	-0.403274	+		+		+	0.640613	-294.111	620.935	10.8806	0.00133629
-0.539013	+	-0.645262		0.187641	-0.545096	-0.393964			+		+	0.640592	-296.464	620.962	10.9075	0.00131842
-0.681905	+	-0.458157		0.476487			+						-302.365	621.513	11.4591	0.00100062
0.858298	+	-0.329671		-1.33322	-0.636525		+					0.750824	-300.18	621.569	11.5154	0.000972838
-1.84081	+	-0.430528		1.52268	0.141261	-0.499385	+		+		+		-295.674	621.708	11.6536	0.000907883
0.859598	+	-0.639807		-1.33193	-0.635603							0.750846	-302.49	621.763	11.7092	0.000883023
-0.560984	+	-0.405807			0.223363		+						-302.503	621.788	11.734	0.000872135
-1.85525	+	-0.668778		1.53712	0.140682	-0.490764			+		+		-298.039	621.811	11.7569	0.00086222
-0.682787	+	-0.740313		0.480997									-304.712	621.876	11.8224	0.000834416
-2.08334	+	-0.733987		1.62088	0.117406	-0.0329973	+		+				-298.108	621.95	11.8958	0.000804344
-0.560602	+	-0.648963			0.225098								-304.84	622.132	12.078	0.000734323
-2.07953	+	-0.672194		1.61824	0.117049	-0.0361887			+				-300.505	622.218	12.1643	0.000703312
-0.363129	+			1.69886	-2.37968	0.137404			+	+		1.23008	-298.591	622.916	12.8622	0.00049614
-0.177114	+	-0.347598					+						-304.282	623.17	13.1158	0.000437038
-1.92048	+	-0.77012	-0.0044392	1.8909			+		+				-300.103	623.665	13.6114	0.000341126
-0.172545	+	-0.677324											-306.707	623.735	13.6813	0.000329412
-1.90057	+	-0.726511	-0.00474369	1.88839					+				-302.468	623.919	13.8646	0.000300552
-0.617245	+	-0.422587		0.11555	0.184871		+						-302.57	624.124	14.0698	0.000271242
-0.618474	+	-0.669568		0.119119	0.18537								-304.91	624.425	14.3707	0.000233365
-0.306261	+			1.68148	-2.20774	-0.27382			+	+	+	1.14228	-297.1	624.56	14.5063	0.000218061
-0.68506	+	-0.972001	-0.00246373	2.12369	-2.11133	0.120073	+		+	+		1.01304	-294.739	624.569	14.5146	0.000217159
-0.524079	+	-0.147217		0.516649		-0.520631	+				+		-300.558	624.574	14.5195	0.000216625
-0.624438	+	-0.563221	-0.00280405	2.05156	-2.09768	0.116773			+	+		1.01715	-297.12	624.599	14.5452	0.000213867
-0.377072	+	-0.0790966			0.23654	-0.536702	+				+		-300.699	624.857	14.8032	0.000187978
-2.60667	+	-0.994488	-0.00254511	3.71493	-0.789639		+		+	+			-297.277	624.914	14.8597	0.000182747
-0.529308	+	-0.747415		0.521542		-0.499413					+		-303.004	624.992	14.9379	0.000175737
-2.55042	+	-0.634818	-0.00302105	3.65457	-0.771757				+	+			-299.721	625.176	15.1219	0.000160286
-0.380854	+	-0.650321			0.238749	-0.516634					+		-303.131	625.247	15.1925	0.000154732
-0.45214	+	-0.631885	-0.003669	0.196371	-0.601156		+		+			0.671185	-298.8	625.633	15.5786	0.000127565
-0.430843	+	-0.652215	-0.0039092	0.188182	-0.604094				+			0.674651	-301.117	625.694	15.6395	0.00012374
-0.660777	+	-0.416925		0.481595		-0.0689554	+						-303.482	625.948	15.8943	0.000108937
0.856242	+	-0.0770261		-1.20074	-0.535313	-0.429256	+				+	0.675775	-298.97	625.974	15.9198	0.00010756
0.855721	+	-0.645342		-1.20271	-0.535738	-0.408994					+	0.677425	-301.38	626.218	16.1635	9.52179e-05
-0.661341	+	-0.736351		0.485923		-0.0679614							-305.84	626.285	16.2308	9.20692e-05
0.904697	+	-0.341782		-1.39891	-0.659869	0.027758	+					0.777687	-301.43	626.318	16.2639	9.05593e-05
-0.751228	+	-0.55888	3.70001e-05	2.09257	-1.95769	-0.287357			+	+	+	0.933079	-295.654	626.399	16.3454	8.69396e-05
0.908621	+	-0.637985		-1.40135	-0.660462	0.0292105						0.779324	-303.743	626.469	16.4146	8.39847e-05
-0.540556	+	-0.378676			0.221143	-0.0431644	+						-303.752	626.488	16.4336	8.31927e-05
-0.779475	+	-0.722821	0.000169749	2.12457	-1.9623	-0.282272	+		+	+	+	0.930372	-293.349	626.629	16.575	7.75133e-05
-0.922066	+	-0.460561			0.433467		+			+			-302.789	626.786	16.732	7.1662e-05
-0.540265	+	-0.646362			0.222945	-0.0423627							-306.098	626.802	16.7483	7.10798e-05
-2.70573	+			3.63264	-0.775926				+	+			-302.835	626.879	16.8249	6.84082e-05
0.618693	+	-0.365157		-1.34377	-0.49026		+			+		0.750523	-300.632	626.996	16.9425	6.45025e-05
0.0279233	+	-0.0198829				-0.532753	+				+		-302.915	627.04	16.9856	6.31257e-05
-0.922251	+	-0.655513			0.435143					+			-305.136	627.055	17.0014	6.2631e-05
-1.79547	+	-0.731444	-0.0049022	1.58079	0.134199		+		+				-300.687	627.108	17.0538	6.10091e-05
0.617853	+	-0.638533		-1.34162	-0.489352					+		0.750924	-302.953	627.114	17.0602	6.0815e-05
-0.446597	+	-0.101893		0.139965	0.189805	-0.532638	+				+		-300.727	627.186	17.1324	5.86585e-05
-1.77468	+	-0.676039	-0.00520265	1.57568	0.135057				+				-303.047	627.302	17.2478	5.53699e-05
-0.451794	+	-0.674884		0.143142	0.190858	-0.512431					+		-303.161	627.53	17.4761	4.93964e-05
-0.154036	+	-0.310711				-0.0599652	+						-305.444	627.671	17.6174	4.60278e-05
0.0279233	+	-0.678544				-0.509548					+		-305.456	627.696	17.6415	4.54767e-05
-0.149357	+	-0.673319				-0.0590841							-307.879	628.209	18.1547	3.51832e-05
-1.9288	+	-0.752894	-0.00406105	1.88853		-0.0293543	+		+				-301.387	628.506	18.4524	3.03181e-05
-1.91044	+	-0.723822	-0.00433857	1.88671		-0.0308189			+				-303.753	628.714	18.6605	2.73224e-05
-0.605882	+	-0.395143		0.140183	0.174127	-0.0493532	+						-303.783	628.775	18.7207	2.65119e-05
-1.9548	+	-0.475711	0.000116054	1.84965		-0.490108	+		+		+		-299.216	628.791	18.7368	2.62994e-05
-1.96429	+	-0.72139	2.83279e-05	1.86313		-0.480685			+		+		-301.582	628.898	18.8435	2.49326e-05
-0.606768	+	-0.670721		0.143027	0.174927	-0.0485771							-306.132	629.046	18.9919	2.31498e-05
-0.222049	+			-0.585935	-0.527815				+			0.798845	-305.039	629.062	19.0078	2.2967e-05
0.080857		-0.540118											-311.496	629.119	19.0647	2.23219e-05
-0.977907	+	-0.477142		0.113667	0.395891		+			+			-302.856	629.17	19.1159	2.17577e-05
1.25815		-0.441766		-1.64433	-0.499744							0.714163	-308.441	629.334	19.2798	2.00456e-05
-0.980483	+	-0.676148		0.118529	0.395988					+			-305.205	629.393	19.3387	1.94644e-05
-0.257219		-0.509594			0.192581								-310.629	629.47	19.4161	1.87255e-05
-2.60425	+	-0.999357	-0.00265607	3.71635	-0.789965	0.00818037	+		+	+			-298.589	629.889	19.8354	1.51838e-05
-2.54883	+	-0.634685	-0.00308278	3.65493	-0.771818	0.00445225			+	+			-301.042	630.117	20.0634	1.3548e-05
-0.722962	+	-0.129669			0.43856	-0.540075	+			+	+		-301.055	630.144	20.09	1.33688e-05
-0.308347	+	-0.654783	-0.00438917	0.0517397	-0.649372	0.0602525	+		+			0.727978	-299.922	630.203	20.1486	1.29831e-05
-0.286493	+	-0.650252	-0.00462977	0.0433637	-0.652135	0.0594808			+			0.731099	-302.248	630.229	20.1746	1.28155e-05
-0.555996	+		-0.000750632	1.89126	-2.14415				+	+		1.06785	-302.256	630.246	20.1918	1.27053e-05
-0.730254	+	-0.656637			0.442818	-0.521618				+	+		-303.48	630.419	20.3651	1.16508e-05
-2.54572	+	-0.623189	0.000681641	3.56208	-0.741974	-0.444331			+	+	+		-298.921	630.553	20.4993	1.08947e-05
-2.56339	+	-0.714672	0.00083125	3.57908	-0.747164	-0.441692	+		+	+	+		-296.561	630.62	20.5658	1.05383e-05
-0.191422		-0.564317		0.272713									-311.295	630.803	20.7492	9.61492e-06
-0.318344	+	-0.438448	-0.00653664	0.494498			+						-305.963	630.909	20.855	9.11963e-06
-0.169993	+	-0.382899	-0.00696677		0.233155		+						-306.014	631.011	20.9569	8.66653e-06
1.14343	+	-0.313212	-0.0059962	-1.28266	-0.599607		+					0.724723	-303.877	631.212	21.158	7.83756e-06
-0.317203	+	-0.753501	-0.00655155	0.498354									-308.305	631.216	21.1616	7.82371e-06
-0.167114	+	-0.659403	-0.00699797		0.23477								-308.342	631.288	21.2345	7.54366e-06
-0.152205		-0.472692		-0.259305	0.280236								-310.487	631.295	21.2412	7.51818e-06
1.14243	+	-0.649661	-0.00597715	-1.28009	-0.597256							0.723585	-306.19	631.363	21.3088	7.26849e-06
-0.435398	+	-0.645466	-0.00162557	0.166099	-0.543439	-0.383209			+		+	0.644371	-300.512	631.384	21.3296	7.19303e-06
-0.425002	+	-0.386176	-0.00154209	0.151669	-0.543066	-0.393129	+		+		+	0.644225	-298.157	631.405	21.3506	7.11815e-06
-0.904884	+	-0.432005			0.433907	-0.0466079	+			+			-304.021	631.5	21.4457	6.7874e-06
0.630334	+	-0.108843		-1.2193	-0.39308	-0.431868	+			+	+	0.676865	-299.467	631.645	21.5914	6.3107e-06
-0.90518	+	-0.653006			0.435803	-0.0463705				+			-306.375	631.734	21.6798	6.03768e-06
0.690467	+	-0.376783		-1.42877	-0.527099	0.0314522	+			+		0.785988	-301.854	631.741	21.6867	6.01704e-06
-2.70658	+			3.63323	-0.776144	0.00152125			+	+			-304.147	631.753	21.6992	5.97938e-06
-2.44654	+			3.45289	-0.709453	-0.464319			+	+	+		-301.863	631.759	21.7054	5.96106e-06
0.623189	+	-0.643388		-1.21773	-0.391	-0.412919				+	+	0.677806	-301.876	631.785	21.7313	5.88428e-06
0.691986	+	-0.635608		-1.42917	-0.527646	0.0322597				+		0.787575	-304.179	631.816	21.7624	5.79358e-06
-1.80194	+	-0.724716	-0.00472509	1.58669	0.13119	-0.0129429	+		+				-301.986	632.006	21.9515	5.27086e-06
-1.8986	+			1.04265	0.353464				+				-307.647	632.076	22.0222	5.08765e-06
-1.78242	+	-0.676032	-0.0050017	1.58264	0.131711	-0.0144217			+				-304.35	632.159	22.1049	4.88159e-06
-1.78406	+	-0.429702	-0.00096166	1.51462	0.144622	-0.493397	+		+		+		-299.73	632.171	22.1172	4.85178e-06
-1.79333	+	-0.669	-0.00105008	1.52834	0.144366	-0.484185			+		+		-302.098	632.23	22.1756	4.712e-06
-0.792332	+	-0.152284		0.1382	0.392836	-0.536069	+			+	+		-301.081	632.521	22.4669	4.07334e-06
-0.801969	+	-0.68137		0.142833	0.395573	-0.517431				+	+		-303.507	632.747	22.6928	3.63846e-06
0.144058	+	-0.327547	-0.00548658				+						-308.064	632.911	22.8567	3.35214e-06
1.42932		-0.446113		-1.90463	-0.60801	0.117597						0.830703	-309.16	632.925	22.8708	3.32852e-06
-0.226306	+	-0.399708	-0.00696778	0.115774	0.19459		+						-306.082	633.373	23.3186	2.66076e-06
-0.206909	+		-0.00252031	1.65107	-2.35513	0.147812			+	+		1.22797	-302.675	633.383	23.3293	2.64669e-06
0.151783	+	-0.686543	-0.00553351										-310.482	633.416	23.3621	2.60352e-06
-0.121531	+			-0.722563	-0.578696	0.0554051			+			0.855005	-306.175	633.558	23.5043	2.42495e-06
-0.224763	+	-0.679832	-0.00699348	0.118141	0.195362								-308.413	633.609	23.5546	2.36464e-06
0.0749311		-0.541649				0.0116487							-312.803	633.82	23.7655	2.12802e-06
-0.971717	+	-0.448624		0.140855	0.387403	-0.0530205	+			+			-304.048	633.83	23.7761	2.11679e-06
1.48129				-2.17109	-0.469466							0.812389	-311.755	633.831	23.7767	2.11611e-06
-0.974127	+	-0.677932		0.145203	0.387929	-0.0528638				+			-306.404	634.016	23.9621	1.92875e-06
-2.15121	+			1.85323					+				-309.726	634.058	24.0037	1.88907e-06
-0.275511		-0.513177			0.194446	0.0295231							-311.911	634.142	24.0882	1.81095e-06
-0.079568	+			-0.623085	-0.455257	-0.411496			+		+	0.765256	-304.33	634.394	24.3402	1.59653e-06
1.31585	+			-2.12921	-0.546038							0.86664	-309.951	634.508	24.454	1.50826e-06
-0.498092	+	-0.147376	-0.000464022	0.516665		-0.517623	+				+		-304.62	634.974	24.92	1.19472e-06
-0.31496	+		0.000131064	1.68446	-2.2085	-0.274646			+	+	+	1.14201	-301.16	635.031	24.9773	1.16101e-06
-0.259157	+	-0.0804502	-0.00218059		0.239047	-0.522609	+				+		-304.714	635.161	25.1069	1.08814e-06
-0.504564	+	-0.748156	-0.000441594	0.521547		-0.49653					+		-307.072	635.352	25.2985	9.88773e-07
-0.26291	+	-0.653682	-0.00218056		0.241238	-0.50247					+		-307.15	635.509	25.455	9.14312e-07
-0.198101		-0.566009		0.27291		0.0127435							-312.603	635.527	25.4734	9.05935e-07
-0.337574	+	-0.414785	-0.0059568	0.496048		-0.0424976	+						-307.187	635.582	25.5278	8.81653e-07
1.28028	+	-0.337191	-0.00677093	-1.41772	-0.645155	0.0598325	+					0.779253	-304.989	635.712	25.6581	8.26057e-07
1.28355	+	-0.647144	-0.00677806	-1.4193	-0.644461	0.0615067						0.779898	-307.299	635.807	25.7527	7.8786e-07
-0.173798	+	-0.376028	-0.00679941		0.232313	-0.0118076	+						-307.308	635.826	25.7717	7.80414e-07
-0.335834	+	-0.749964	-0.00598513	0.499834		-0.0411197							-309.539	635.861	25.8071	7.66747e-07
-0.839956	+	-0.699967	-0.0226035	1.87465			+	+	+				-303.932	635.898	25.8444	7.5255e-07
-0.840314	+	-0.704807	-0.0226009	1.8749				+	+				-306.231	635.92	25.8664	7.4433e-07
-0.170699		-0.475638		-0.270053	0.286198	0.0368741							-311.743	635.938	25.8839	7.37833e-07
-0.534121	+	-0.43845	-0.00703091		0.447216		+			+			-306.289	636.036	25.9821	7.02511e-07
-0.17052	+	-0.658532	-0.00684748		0.234027	-0.0105316							-309.644	636.071	26.0166	6.90478e-07
-0.530943	+	-0.667062	-0.00709243		0.449304					+			-308.62	636.224	26.1701	6.39463e-07
1.02917	+	-0.0754464	-0.0027244	-1.23596	-0.535366	-0.410857	+				+	0.684387	-302.952	636.264	26.21	6.26825e-07
-0.227887	+	-0.577476	-0.0136057	2.08363	-1.73282			+	+	+		0.824013	-301.797	636.306	26.2524	6.13677e-07
-1.64304	+			0.964974	0.37377	-0.528728			+		+		-306.478	636.414	26.3596	5.81652e-07
1.02767	+	-0.646037	-0.00270984	-1.23771	-0.535685	-0.390628					+	0.685917	-305.366	636.466	26.4122	5.66561e-07
-0.269616	+	-0.839431	-0.0133683	2.13174	-1.73962		+	+	+	+		0.819964	-299.491	636.479	26.4254	5.62838e-07
0.861502	+	-0.352527	-0.00578373	-1.27308	-0.437706		+			+		0.715073	-304.365	636.764	26.71	4.88184e-07
-1.88834	+			1.05574	0.346915	-0.0327633			+				-308.899	636.781	26.7268	4.84109e-07
0.859366	+	-0.649934	-0.00580072	-1.26952	-0.434675					+		0.714184	-306.684	636.826	26.7716	4.73366e-07
-0.120699				-0.622598	0.428853								-314.373	636.958	26.9037	4.43112e-07
-2.53201	+		-0.00263476	3.57491	-0.751545				+	+			-306.915	637.288	27.2342	3.75634e-07
0.0528313	+	-0.0200309	-0.000444443			-0.529872	+				+		-306.965	637.388	27.3344	3.57262e-07
-0.339082	+	-0.101025	-0.00187368	0.127492	0.196124	-0.52089	+				+		-304.745	637.523	27.4687	3.34061e-07
1.64112				-2.41583	-0.569005	0.108416						0.920721	-312.556	637.563	27.5087	3.27447e-07
0.1283	+	-0.306266	-0.00496973			-0.0376665	+						-309.294	637.571	27.517	3.26092e-07
-0.344838	+	-0.675617	-0.00186317	0.130673	0.197156	-0.500695					+		-307.183	637.825	27.7714	2.87142e-07
-0.397175					0.223823								-315.906	637.938	27.884	2.71431e-07
0.0523657	+	-0.679275	-0.000436135			-0.5067					+		-309.51	638.004	27.9501	2.62605e-07
0.136561	+	-0.683244	-0.00503069			-0.0363092							-311.722	638.048	27.9944	2.56845e-07
-0.621516	+				0.255245								-313.873	638.066	28.0123	2.54559e-07
-0.342769		-0.55883	0.00658282										-314.972	638.158	28.1037	2.43193e-07
-0.236296	+	-0.390696	-0.00671715	0.124594	0.19039	-0.0176875	+						-307.355	638.169	28.1155	2.41764e-07
0.856777		-0.471395	0.007006	-1.64367	-0.572104							0.755085	-311.789	638.184	28.1298	2.40038e-07
-0.234038	+	-0.679877	-0.00675838	0.126261	0.191493	-0.0164317							-309.695	638.374	28.3195	2.18319e-07
-2.11775	+			1.84892		-0.0733981			+				-310.796	638.374	28.3199	2.1827e-07
0.600818	+	-0.63706	-0.0227885	0.27704	-0.571357			+	+			0.635738	-305.194	638.421	28.3673	2.13164e-07
-0.590509	+	-0.455328	-0.00704105	0.115918	0.408916		+			+			-306.355	638.443	28.3891	2.10852e-07
-0.377818	+			-0.485391	0.413233								-313.01	638.471	28.4166	2.07967e-07
0.605929	+	-0.565782	-0.0228321	0.272853	-0.570352		+	+	+			0.635319	-302.909	638.53	28.4763	2.0185e-07
-0.676682		-0.528258	0.0065338		0.192008								-314.111	638.542	28.488	2.00672e-07
-0.58937	+	-0.687844	-0.00709617	0.119343	0.409887					+			-308.689	638.586	28.5324	1.96267e-07
-1.92029	+			1.82344		-0.506504			+		+		-308.851	638.911	28.8572	1.66852e-07
-0.0102368													-317.463	638.988	28.9344	1.60532e-07
1.39719	+			-2.24364	-0.588839	0.0497816						0.914613	-311.103	638.989	28.9353	1.60456e-07
1.38945	+			-2.08798	-0.464566	-0.42428					+	0.820487	-309.006	639.221	29.1672	1.42896e-07
-0.079792	+		-0.00290933	-0.569289	-0.502574				+			0.782091	-309.103	639.414	29.3601	1.29755e-07
-0.682594		-0.587273	0.00719432	0.300953									-314.59	639.501	29.4465	1.24266e-07
1.23177	+			-2.21651	-0.489926					+		0.907411	-310.261	639.506	29.452	1.2393e-07
-0.684277	+	-0.66019	-0.0237485	1.59556	0.120436			+	+				-306.898	639.529	29.4753	1.22494e-07
-0.683541	+	-0.662227	-0.0237539	1.59406	0.121135		+	+	+				-304.594	639.547	29.4932	1.21399e-07
-1.65414	+	-0.632532	-0.0166119	3.35645	-0.645906			+	+	+			-304.628	639.616	29.5615	1.17321e-07
-1.69031	+	-0.905143	-0.0163492	3.40006	-0.658552		+	+	+	+			-302.264	639.619	29.5646	1.1714e-07
0.0851968	+	-0.56407	-0.015174	1.86648	-1.9221	0.132917		+	+	+		0.967874	-302.364	639.818	29.764	1.06029e-07
0.0381342	+	-0.906743	-0.0148845	1.92376	-1.93595	0.135142	+	+	+	+		0.966328	-300.037	640.005	29.951	9.65648e-08
-0.597672	+	-0.131584	-0.00237296		0.443056	-0.524768	+			+	+		-305.058	640.475	30.4206	7.63535e-08
-0.574303		-0.50018	0.00613292	-0.189252	0.256017								-314.091	640.634	30.5803	7.04962e-08
-0.604168	+	-0.660517	-0.00238856		0.44736	-0.506142				+	+		-307.486	640.706	30.6515	6.80293e-08
-0.838631	+	-0.70508	-0.022657	1.87509		0.00358236		+	+				-307.555	640.844	30.7898	6.34838e-08
-0.838357	+	-0.702101	-0.0226604	1.87494		0.0036968	+	+	+				-305.25	640.86	30.8057	6.2982e-08
-0.540451	+	-0.429413	-0.00681008		0.446934	-0.0158825	+			+			-307.576	640.886	30.8317	6.21694e-08
-0.181932	+												-316.351	640.914	30.8604	6.12838e-08
-0.537041	+	-0.665906	-0.00688172		0.449096	-0.0150159				+			-309.915	641.039	30.9853	5.75712e-08
1.0306	+	-0.37337	-0.00651244	-1.4282	-0.502174	0.0606939	+			+		0.779045	-305.462	641.284	31.2298	5.09481e-08
1.03282	+	-0.645792	-0.00654957	-1.42823	-0.50111	0.0619133				+		0.779783	-307.779	641.292	31.2382	5.07342e-08
-0.429725	+				0.267293	-0.540273					+		-312.377	641.537	31.4834	4.48806e-08
-0.129443				-0.628816	0.432145	0.0176204							-315.653	641.628	31.5735	4.29025e-08
-0.177173				0.164734									-317.785	641.698	31.6438	4.14214e-08
0.795983	+	-0.107724	-0.00269755	-1.25055	-0.390186	-0.413914	+			+	+	0.683746	-303.448	641.987	31.9326	3.58513e-08
-0.179775	+			-0.491559	0.428051	-0.55164					+		-311.506	641.995	31.9408	3.57042e-08
-0.16353	+	-0.558937	-0.00961645	1.91713	-1.86495	-0.23124		+	+	+	+	0.924191	-301.051	642.032	31.9784	3.50409e-08
0.605171	+	-0.390019	-0.0233195	0.550109			+	+					-309.305	642.068	32.0137	3.44276e-08
0.788603	+	-0.644343	-0.00269491	-1.24899	-0.387978	-0.394921				+	+	0.684624	-305.861	642.082	32.0281	3.41806e-08
-2.52721	+		-0.00282126	3.57602	-0.751742	0.013433			+	+			-308.187	642.108	32.0542	3.37368e-08
-1.6318	+		-0.00437495	1.01632	0.363627				+				-311.565	642.114	32.0595	3.36474e-08
-2.5063	+		0.000954517	3.4716	-0.717471	-0.470014			+	+	+		-305.89	642.139	32.0854	3.32142e-08
0.596925	+	-0.731437	-0.0231448	0.55269				+					-311.618	642.219	32.1654	3.19118e-08
1.02069		-0.469951	0.00601959	-1.80708	-0.629848	0.073786						0.822446	-312.817	642.416	32.3617	2.89283e-08
-0.183978	+	-0.698762	-0.00956426	1.94338	-1.86824	-0.226554	+	+	+	+	+	0.921788	-298.767	642.418	32.364	2.88951e-08
-0.590429	+				0.25181	-0.0639853							-314.994	642.439	32.3852	2.85914e-08
-1.01764	+	-0.706574	-0.0167483	1.85711		-0.372743		+	+		+		-306.097	642.554	32.4998	2.69993e-08
-0.477442	+			0.278097									-316.141	642.603	32.5492	2.63403e-08
-0.393614					0.223438	-0.00545401							-317.198	642.609	32.5553	2.626e-08
-1.00483	+	-0.480094	-0.0167395	1.84466		-0.380963	+	+	+		+		-303.761	642.613	32.5586	2.62171e-08
0.829004	+	-0.634073	-0.0242186	0.0719202	-0.641044	0.0880414		+	+			0.7165	-306.156	642.673	32.6185	2.54431e-08
-0.355559		-0.555485	0.00706536			-0.0358996							-316.19	642.7	32.6463	2.5092e-08
0.830353	+	-0.598676	-0.0242426	0.0707042	-0.639419	0.0879394	+	+	+			0.715536	-303.87	642.831	32.7771	2.35029e-08
-0.675655	+	-0.151761	-0.00208183	0.124735	0.401235	-0.52303	+			+	+		-305.088	642.887	32.8331	2.2854e-08
0.909512	+	-0.31646	-0.0255904		0.239372		+	+					-309.727	642.912	32.8578	2.25737e-08
0.902826	+	-0.631588	-0.0254415		0.240724			+					-312.032	643.048	32.994	2.10883e-08
-0.367567	+			-0.466054	0.404733	-0.0410802							-314.223	643.051	32.9967	2.1059e-08
-0.685184	+	-0.682403	-0.0020832	0.129254	0.404025	-0.504331				+	+		-307.518	643.069	33.0154	2.08632e-08
-0.921631	+				0.429508					+			-314.294	643.194	33.14	1.9603e-08
-0.680651		-0.526911	0.00675234		0.190963	-0.0162388							-315.375	643.201	33.1473	1.95314e-08
-0.604718	+	-0.444438	-0.0067361	0.127103	0.404829	-0.0220028	+			+			-307.618	643.27	33.2161	1.88713e-08
2.05501	+	-0.267353	-0.0238309	-1.11744	-0.578517		+	+				0.68447	-307.671	643.376	33.3221	1.7897e-08
-0.603204	+	-0.68807	-0.00679891	0.13001	0.406072	-0.0212071				+			-309.96	643.379	33.3252	1.78697e-08
2.04246	+	-0.63902	-0.0236564	-1.11193	-0.574006			+				0.681345	-309.977	643.412	33.3576	1.75825e-08
0.00484698						-0.0284133							-318.714	643.555	33.501	1.63658e-08
-0.679406	+			-0.493199	0.593168					+			-313.4	643.584	33.5295	1.61344e-08
1.20538			0.00500257	-2.19584	-0.519684							0.846313	-315.633	643.717	33.6627	1.50947e-08
0.0919026	+		-0.00377632	-0.740077	-0.560503	0.07127			+			0.84934	-310.143	643.745	33.6912	1.48808e-08
1.3704	+			-2.37889	-0.564355	0.0627052				+		0.977258	-311.345	643.899	33.8451	1.37792e-08
-0.698188		-0.583768	0.00772303	0.302423		-0.0391123							-315.8	644.051	33.9972	1.27699e-08
1.35526	+			-2.22119	-0.43155	-0.417853				+	+	0.879621	-309.297	644.327	34.2728	1.11261e-08
-1.98688	+		-0.0027701	1.85132					+				-313.788	644.358	34.304	1.09536e-08
-0.67155	+	-0.660181	-0.0240527	1.58819	0.124003	0.0172564		+	+				-308.198	644.429	34.3747	1.05735e-08
-0.671251	+	-0.671218	-0.0240585	1.58701	0.124774	0.0175423	+	+	+				-305.886	644.485	34.4307	1.02817e-08
1.53249	+		-0.00446724	-2.09964	-0.516347							0.847598	-313.872	644.527	34.4725	1.00687e-08
-1.64032	+	-0.631713	-0.0170633	3.35755	-0.645802	0.0286646		+	+	+			-305.908	644.529	34.4745	1.00586e-08
-1.67801	+	-0.923093	-0.0168143	3.40424	-0.659314	0.0306904	+	+	+	+			-303.532	644.562	34.5079	9.89213e-09
0.0137072	+		-0.00146131	-0.642681	-0.453742	-0.401832			+		+	0.768689	-308.34	644.714	34.66	9.16776e-09
0.578705	+	-0.63069	-0.018845	0.121497	-0.570234	-0.268864		+	+		+	0.666282	-304.916	644.922	34.8679	8.26257e-09
-0.148888	+					-0.0839982							-317.342	645.005	34.951	7.92632e-09
0.763753	+	-0.350182	-0.0248886	0.214123	0.168286		+	+					-309.649	645.032	34.9777	7.82135e-09
0.591818	+	-0.39022	-0.0188395	0.108271	-0.569206	-0.277674	+	+	+		+	0.665764	-302.593	645.116	35.0621	7.49807e-09
0.755953	+	-0.667966	-0.0247309	0.216009	0.168844			+					-311.956	645.122	35.0677	7.47725e-09
0.0279233	+					-0.533453					+		-315.259	645.124	35.0703	7.4672e-09
1.20536	+	-0.261291	-0.0236168				+	+					-312.036	645.28	35.2262	6.90732e-09
-0.578106		-0.500062	0.0062446	-0.185719	0.254324	-0.0077424							-315.351	645.308	35.2542	6.81141e-09
1.19901	+	-0.660288	-0.0234139					+					-314.43	645.642	35.5884	5.76324e-09
0.165015	+		-0.0134804	1.70952	-1.94888			+	+	+		1.00769	-307.724	645.807	35.7531	5.30767e-09
-0.834987	+	-0.65526	-0.0180706	1.52847	0.141683	-0.374468		+	+		+		-306.631	645.974	35.9195	4.88378e-09
-1.83284	+	-0.622278	-0.0107041	3.33875	-0.6463	-0.376434		+	+	+	+		-304.239	645.975	35.9207	4.8809e-09
-0.821814	+	-0.434913	-0.0180672	1.51507	0.142238	-0.382464	+	+	+		+		-304.291	646.078	36.0242	4.63474e-09
-1.84022	+	-0.686331	-0.0106788	3.3491	-0.649266	-0.374112	+	+	+	+	+		-301.902	646.197	36.1432	4.36705e-09
-0.162153				0.16502		-0.0288408							-319.035	646.282	36.2283	4.1852e-09
-0.304746	+			0.311363		-0.528851					+		-314.847	646.476	36.4217	3.79945e-09
-0.450317	+			0.286111		-0.0905984							-317.086	646.624	36.5702	3.52749e-09
-1.59801	+		-0.000762729	0.958464	0.376502	-0.523959			+		+		-310.494	646.722	36.6681	3.35901e-09
-1.63964	+		-0.00417164	1.02337	0.360238	-0.0145923			+				-312.821	646.85	36.7962	3.15059e-09
-0.721168	+				0.437512	-0.544617				+	+		-312.846	646.901	36.8466	3.0722e-09
0.604544	+	-0.389316	-0.0233002	0.550089		-0.00125067	+	+					-310.603	646.939	36.8852	3.01346e-09
0.597236	+	-0.731484	-0.0231543	0.552699		0.000609398		+					-312.923	647.054	37.0004	2.84473e-09
-0.386484			0.00387859	-0.591655	0.419002								-318.461	647.243	37.1891	2.58872e-09
-0.470233	+			-0.502181	0.604324	-0.556295				+	+		-311.933	647.325	37.2712	2.48455e-09
2.27033	+	-0.635378	-0.0252042	-1.31544	-0.647111	0.0955487		+				0.766394	-310.88	647.492	37.4385	2.28523e-09
0.602826	+	-0.373649	-0.0276363		0.487511		+	+		+			-309.731	647.496	37.4415	2.28173e-09
0.59603	+	-0.640799	-0.0275177		0.489572			+		+			-312.033	647.524	37.4703	2.24912e-09
2.27706	+	-0.305396	-0.0253286	-1.31639	-0.649804	0.0936865	+	+				0.767594	-308.586	647.532	37.4775	2.241e-09
-0.897468	+				0.430473	-0.0656464				+			-315.403	647.588	37.5344	2.17815e-09
0.920374	+	-0.331156	-0.026		0.24129	0.0255125	+	+					-310.996	647.725	37.6711	2.03428e-09
-0.321281	+		-0.00535284		0.263014								-317.669	647.79	37.7361	1.96919e-09
0.914708	+	-0.633396	-0.0258863		0.24274	0.0272847		+					-313.304	647.816	37.7622	1.94367e-09
1.38052			0.00394826	-2.36977	-0.581961	0.079358						0.91846	-316.616	647.838	37.7839	1.92276e-09
-0.712505			0.00485246		0.224247								-319.815	647.842	37.7884	1.9184e-09
-0.0604809	+		-0.00558451	-0.493573	0.424001								-316.772	648.15	38.0955	1.6453e-09
-0.673713	+			-0.473249	0.587166	-0.0420849				+			-314.605	648.195	38.1406	1.60868e-09
0.39886	+	-0.159714	-0.0169973	0.54439		-0.4098	+	+			+		-308.961	648.282	38.2276	1.54018e-09
0.396189	+	-0.73271	-0.0170253	0.548362		-0.389373		+			+		-311.384	648.501	38.4474	1.37989e-09
0.538373	+		-0.0154103	1.45346	-2.1752	0.163261		+	+	+		1.17915	-307.966	648.643	38.5893	1.28536e-09
0.688594	+	-0.0877046	-0.0192821		0.245279	-0.411857	+	+			+		-309.153	648.665	38.6112	1.27136e-09
1.75232	+	-0.64186	-0.0253425	-1.05736	-0.340427			+		+		0.645111	-310.333	648.7	38.6456	1.24969e-09
1.70513	+		-0.00546488	-2.26786	-0.575109	0.0760589						0.916641	-314.879	648.742	38.688	1.22347e-09
-2.00725	+		-0.00192142	1.84804		-0.0657475			+				-314.883	648.75	38.6961	1.21854e-09
1.76723	+	-0.312017	-0.0254874	-1.06423	-0.345702		+	+		+		0.647857	-308.031	648.775	38.7206	1.20368e-09
0.687736	+	-0.634678	-0.0193272		0.247257	-0.392345		+			+		-311.561	648.855	38.8011	1.15623e-09
-0.321143			0.00479552										-321.383	648.893	38.839	1.13452e-09
-2.06247	+		0.00252203	1.82422		-0.522811			+		+		-312.812	649.082	39.0278	1.03229e-09
1.54078	+		-0.00237697	-2.11952	-0.464453	-0.408184					+	0.828071	-312.972	649.403	39.3492	8.79045e-10
1.99818	+	-0.0889405	-0.0195512	-1.2531	-0.57683	-0.295824	+	+			+	0.715594	-307.157	649.406	39.3517	8.77977e-10
1.99916	+	-0.631839	-0.0195922	-1.25431	-0.575948	-0.276388		+			+	0.716137	-309.546	649.451	39.3967	8.58439e-10
0.452289	+	-0.677006	-0.0268093	0.213017	0.417793			+		+			-311.96	649.654	39.5996	7.7561e-10
1.40587	+		-0.00399989	-2.17757	-0.45223					+		0.884003	-314.233	649.674	39.6204	7.67588e-10
0.46125	+	-0.406463	-0.0269395	0.209917	0.416754		+	+		+			-309.658	649.675	39.6212	7.67283e-10
0.776315	+	-0.359444	-0.0252017	0.206952	0.172023	0.0180393	+	+					-310.923	649.88	39.8261	6.92564e-10
0.769894	+	-0.66796	-0.0250794	0.208186	0.17291	0.0198009		+					-313.234	649.927	39.8733	6.76424e-10
1.20349	+	-0.259278	-0.0235612			-0.00360283	+	+					-313.318	650.095	40.0407	6.22093e-10
1.1982	+	-0.660174	-0.02339			-0.00152521		+					-315.719	650.421	40.3673	5.28372e-10
0.276356	+		-0.00958534	1.50805	-2.115	-0.218185		+	+	+	+	1.13295	-306.551	650.599	40.5448	4.8349e-10
0.577291	+	-0.11444	-0.0187564	0.165587	0.189749	-0.410452	+	+			+		-309.139	650.989	40.9353	3.97733e-10
0.0306156	+		-0.0036278										-320.348	651.017	40.9634	3.92187e-10
0.575028	+	-0.66257	-0.018793	0.167922	0.190812	-0.390897		+			+		-311.549	651.132	41.0784	3.7028e-10
0.986551	+	-0.0255784	-0.0171052			-0.421873	+	+			+		-311.623	651.28	41.2257	3.43986e-10
1.14364	+		-0.0249958	-0.483406	-0.471437			+	+			0.744324	-312.881	651.495	41.4408	3.08905e-10
-0.525615			0.00510974	0.181671									-321.642	651.497	41.4428	3.08594e-10
-1.57022	+		-0.0172216	3.25528	-0.616563			+	+	+			-311.824	651.682	41.6276	2.8136e-10
0.98835	+	-0.661982	-0.0171373			-0.399245		+			+		-314.14	651.739	41.6846	2.73461e-10
-0.440301	+		0.000195944		0.267056	-0.541535					+		-316.397	651.777	41.7234	2.68197e-10
-0.392434			0.00405211	-0.586046	0.416325	-0.0119727							-319.693	651.837	41.7829	2.60342e-10
-0.103419	+		-0.00132646	-0.500926	0.432719	-0.543315					+		-315.501	652.21	42.1561	2.16027e-10
-0.722796			0.00544391		0.221256	-0.0431031							-320.989	652.299	42.2445	2.06683e-10
-0.334094	+		-0.00475935		0.259891	-0.042144							-318.857	652.32	42.2659	2.04482e-10
0.606803	+	-0.642131	-0.0278552		0.48994	0.021319		+		+			-313.316	652.366	42.3121	1.99813e-10
0.612609	+	-0.384841	-0.0279463		0.48793	0.0198601	+	+		+			-311.011	652.381	42.3268	1.98355e-10
-0.245998	+		-0.00410657	0.286711									-320.09	652.631	42.5773	1.75001e-10
-0.0692155	+		-0.00536278	-0.485956	0.420368	-0.0154917							-318.009	652.801	42.7467	1.60792e-10
2.00968	+	-0.636246	-0.0266862	-1.2766	-0.435579	0.0905176		+		+		0.737879	-311.268	652.895	42.8408	1.53401e-10
-0.630766	+		-0.00527176		0.439959					+			-318.101	652.985	42.9307	1.46658e-10
2.01847	+	-0.34325	-0.0267928	-1.27901	-0.438429	0.0889537	+	+		+		0.738625	-308.974	653.039	42.9849	1.42735e-10
-0.345537			0.00572682			-0.067783							-322.447	653.108	43.0536	1.37917e-10
-0.372561	+		-0.00549408	-0.500761	0.60657					+			-317.176	653.335	43.2808	1.23104e-10
0.404648	+	-0.14691	-0.0213567		0.479024	-0.402312	+	+		+	+		-309.27	653.631	43.5765	1.06184e-10
0.401039	+	-0.642642	-0.0214182		0.483147	-0.384554		+		+	+		-311.664	653.688	43.6341	1.0317e-10
-0.347119	+		-0.0262211	1.03742	0.347844			+	+				-315.119	653.697	43.6432	1.02704e-10
1.64189	+		-0.00505566	-2.38991	-0.544326	0.0859716				+		0.97359	-315.176	653.81	43.7559	9.70741e-11
0.462973	+	-0.676921	-0.0270452	0.207469	0.419899	0.0137333		+		+			-313.246	654.525	44.4712	6.78863e-11
1.49384	+		-0.00224295	-2.24844	-0.429084	-0.402881				+	+	0.885545	-313.267	654.568	44.5135	6.64663e-11
0.47071	+	-0.412624	-0.0271485	0.204893	0.418707	0.0123257	+	+		+			-310.938	654.588	44.5345	6.57735e-11
1.74744	+	-0.63285	-0.0211151	-1.2141	-0.370423	-0.275597		+		+	+	0.687659	-309.965	655.02	44.9662	5.30038e-11
1.75179	+	-0.129222	-0.0210592	-1.21552	-0.373501	-0.293697	+	+		+	+	0.687317	-307.584	655.098	45.0444	5.09705e-11
-0.0975361	+		0.00223863			-0.547938					+		-319.216	655.215	45.1609	4.80872e-11
0.00149982	+		-0.00264598			-0.0722125							-321.394	655.24	45.1856	4.74965e-11
-0.788268	+		-0.0229751	1.83736				+	+				-317.049	655.306	45.2523	4.59378e-11
1.39986	+		-0.0266078	-0.712271	-0.551099	0.0999712		+	+			0.83545	-313.743	655.52	45.4656	4.12914e-11
-0.55552			0.00608864	0.185618		-0.0707512							-322.69	655.702	45.6477	3.76973e-11
0.295291	+	-0.173187	-0.0208365	0.163148	0.42406	-0.400938	+	+		+	+		-309.255	656.007	45.9533	3.23564e-11
0.289209	+	-0.670624	-0.0208865	0.166826	0.426953	-0.38311		+		+	+		-311.651	656.015	45.9605	3.22398e-11
2.65729	+		-0.0258714	-1.94366	-0.489056			+				0.805157	-317.487	656.183	46.1289	2.96369e-11
-1.55233	+		-0.0178093	3.25688	-0.616477	0.0373905		+	+	+			-313.042	656.444	46.3898	2.60121e-11
-0.440313	+		0.00239785	0.312471		-0.54435					+		-318.799	656.581	46.5268	2.42898e-11
-0.28154	+		-0.00306657	0.291346		-0.0770601							-321.109	656.824	46.7696	2.15126e-11
-0.728489	+		0.000138628		0.43725	-0.545507				+	+		-316.862	657.182	47.1279	1.79839e-11
-1.76106	+		-0.0109492	3.23826	-0.617485	-0.398991		+	+	+	+		-311.18	657.451	47.3966	1.57236e-11
-0.648404	+		-0.00465388		0.439391	-0.0446998				+			-319.277	657.537	47.4833	1.50562e-11
1.14977	+		-0.0209934	-0.671285	-0.483966	-0.271953		+	+		+	0.78884	-312.416	657.543	47.4892	1.5012e-11
-0.391264	+		-0.00140261	-0.511982	0.610228	-0.547515				+	+		-315.923	657.579	47.5253	1.47432e-11
-0.383934	+		-0.005248	-0.492115	0.60347	-0.017525				+			-318.406	658.021	47.9666	1.1824e-11
0.878704	+		-0.0259946		0.268464			+					-320.68	658.144	48.0895	1.11196e-11
-0.334259	+		-0.0265285	1.02998	0.351445	0.0174434		+	+				-316.372	658.478	48.424	9.40695e-12
1.15756	+		-0.0272713	-0.406274	0.400653			+					-320.133	659.25	49.1964	6.39316e-12
-0.509514	+		-0.0201698	0.969681	0.368996	-0.398028		+	+		+		-314.708	659.776	49.7219	4.91607e-12
2.9132	+		-0.0276225	-2.17038	-0.572994	0.108985		+				0.90136	-318.278	660.015	49.9611	4.36185e-12
-0.801005	+		-0.0225545	1.83608		-0.0267933		+	+				-318.285	660.029	49.9752	4.33121e-12
2.51423	+		-0.0271632	-1.99111	-0.346824			+		+		0.817464	-317.78	661.293	51.2393	2.30207e-12
2.64032	+		-0.0217769	-2.11566	-0.505629	-0.277387		+			+	0.854714	-316.86	661.754	51.7003	1.8281e-12
-0.97766	+		-0.0167208	1.81825		-0.398388		+	+		+		-316.912	661.858	51.8044	1.7354e-12
1.20953	+		-0.0237497					+					-323.636	661.878	51.8237	1.71874e-12
0.827725	+		-0.0236017	0.351142				+					-322.95	662.682	52.628	1.14965e-12
0.879702	+		-0.0260323		0.268641	0.00230424		+					-321.935	662.854	52.8001	1.05483e-12
0.612332	+		-0.0278022		0.484628			+		+			-320.917	663.043	52.9894	9.59574e-13
1.17157	+		-0.0276216	-0.414132	0.404738	0.019903		+					-321.366	663.941	53.8867	6.12685e-13
0.654317	+		-0.0195258		0.273275	-0.414084		+			+		-320.286	664.03	53.9763	5.85839e-13
0.896063	+		-0.0291777	-0.423187	0.627782			+		+			-320.313	664.085	54.0309	5.7006e-13
0.962032	+		-0.0209421	-0.452565	0.42232	-0.415412		+			+		-319.58	664.894	54.8397	3.80445e-13
2.82602	+		-0.0288146	-2.25363	-0.465094	0.112577		+		+		0.930964	-318.541	665.116	55.0624	3.40354e-13
1.19322	+		-0.023264			-0.0308984		+					-324.839	666.461	56.407	1.73767e-13
2.55849	+		-0.0229898	-2.19338	-0.402418	-0.268999		+		+	+	0.882378	-317.159	667.031	56.9768	1.30686e-13
0.810843	+		-0.0231055	0.351356		-0.0315584		+					-324.155	667.294	57.2397	1.14587e-13
0.611056	+		-0.0277623		0.484585	-0.00251577		+		+			-322.17	667.798	57.7442	8.90429e-14
0.986478	+		-0.0171039			-0.422783		+			+		-323.352	667.912	57.8579	8.41212e-14
0.908338	+		-0.0294498	-0.429502	0.630184	0.0158613		+		+			-321.549	668.832	58.7776	5.31127e-14
0.611918	+		-0.0170309	0.346739		-0.418131		+			+		-322.699	668.857	58.8027	5.24507e-14
0.405718	+		-0.0213384		0.477802	-0.407575		+		+	+		-320.582	669.197	59.1432	4.42393e-14
0.718367	+		-0.0228375	-0.467255	0.635844	-0.408813		+		+	+		-319.824	670.007	59.9526	2.95148e-14
