# Supplementary material for: American Exceptionalism: Population Trends and Flight Initiation Distances in Birds from Three Continents
Source: PubMed Central journal article supplement (PMC4166455; doi:10.1371/journal.pone.0107883), 2014-09-16

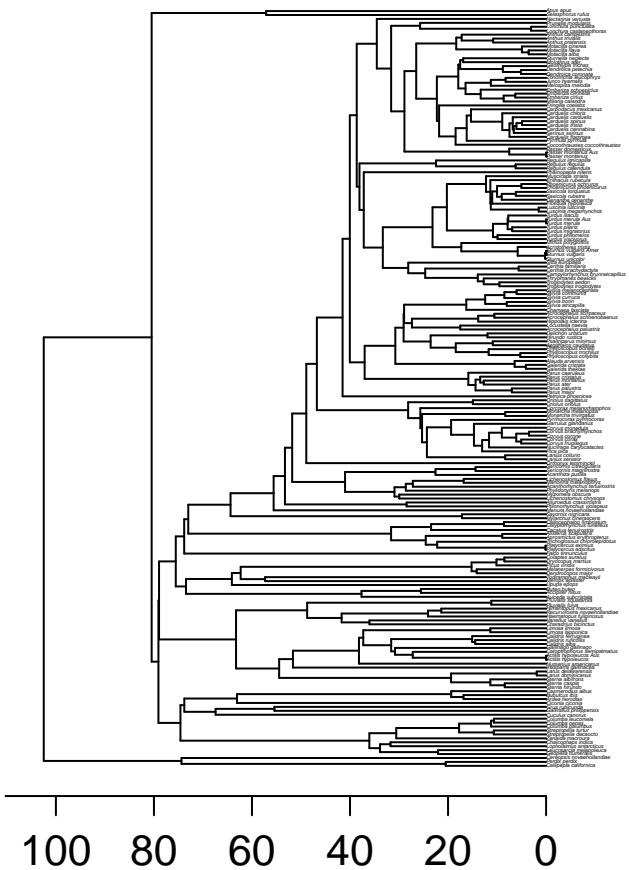

Supplement: pone.0107883.s002.pdf [file pone.0107883.s002.pdf]
